# Supplementary material for: Facile Fabrication of Single-Walled Carbon Nanotube/Anatase Composite Thin Film on Quartz Glass Substrate for Translucent Conductive Photoelectrode
Source: MDPI journal article supplement (doi:10.3390/nano11123352), 2021-12-10
Supplement: s1 [file s1]

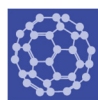

# Facile Fabrication of Single-Walled Carbon Nanotube/Anatase Composite Thin Film on Quartz Glass Substrate for Translucent Conductive Photoelectrode

Yutaka Suwazono <sup>1</sup>, Takuro Murayoshi <sup>2</sup>, Hiroki Nagai <sup>2,3</sup> and Mitsunobu Sato <sup>1,2,3,\*</sup>

<sup>1</sup> Applied Chemistry and Chemical Engineering Program, Graduate School, Kogakuin University, Tokyo 192-0015, Japan; bd19003@ns.kogakuin.ac.jp

<sup>2</sup> Electrical Engineering and Electronics Program, Graduate School, Kogakuin University, Tokyo 192-0015, Japan; cm21051@ns.kogakuin.ac.jp (T.M.); nagai@cc.kogakuin.ac.jp (H.N.)

<sup>3</sup> Department of Applied Physics, School of Advanced Engineering, Kogakuin University, Tokyo 192-0015, Japan

\* Correspondence: lccsato@cc.kogakuin.ac.jp; Tel.: +81-426-731-492

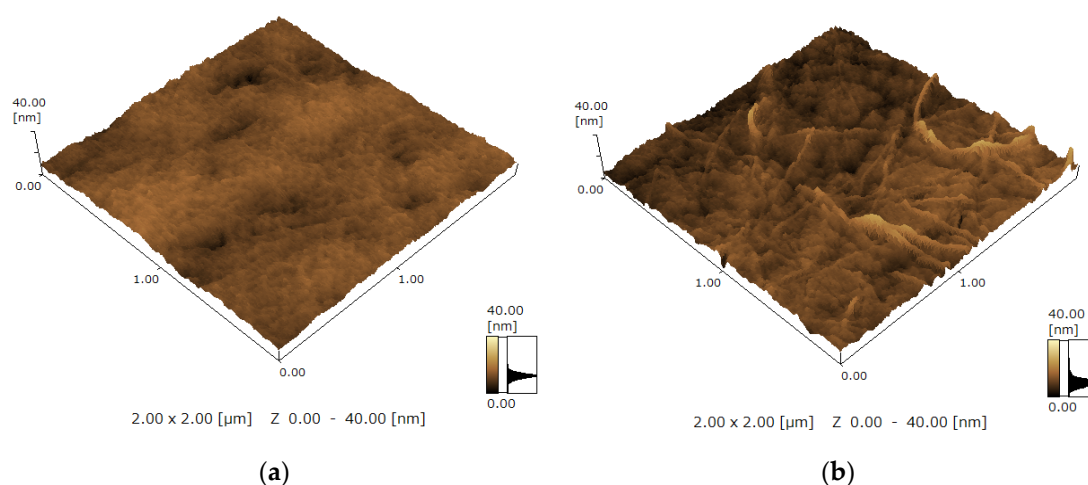

Figure S1. Atomic force microscopy (AFM) 3D surface appearances of (a)  $F_{\text{Titania}}$  and (b)  $F_{\text{COMP}}$ .

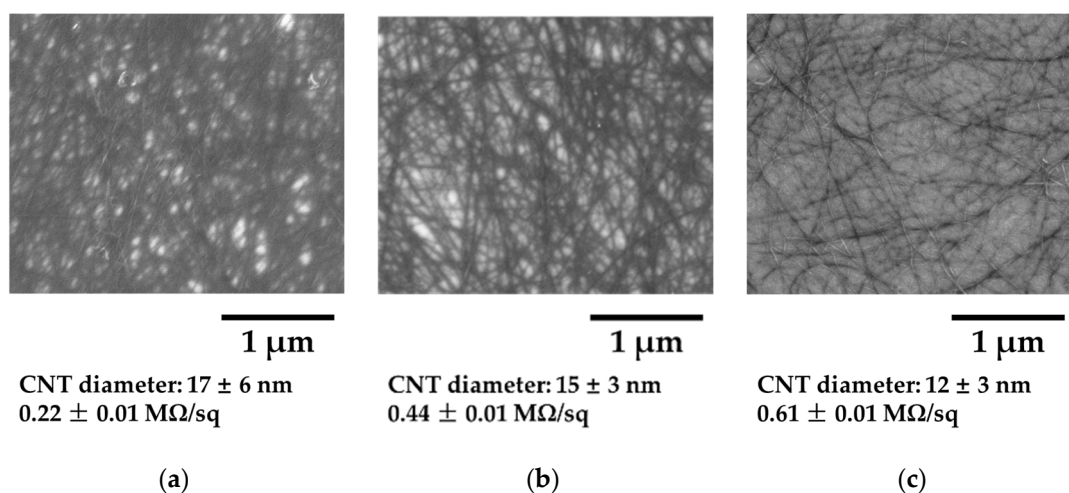

Figure S2. Surface morphologies of (a)  $F_{\text{CNT}}$ , (b)  $F'_{\text{CNT}}$ , and (c)  $F''_{\text{CNT}}$  observed by FE-SEM.

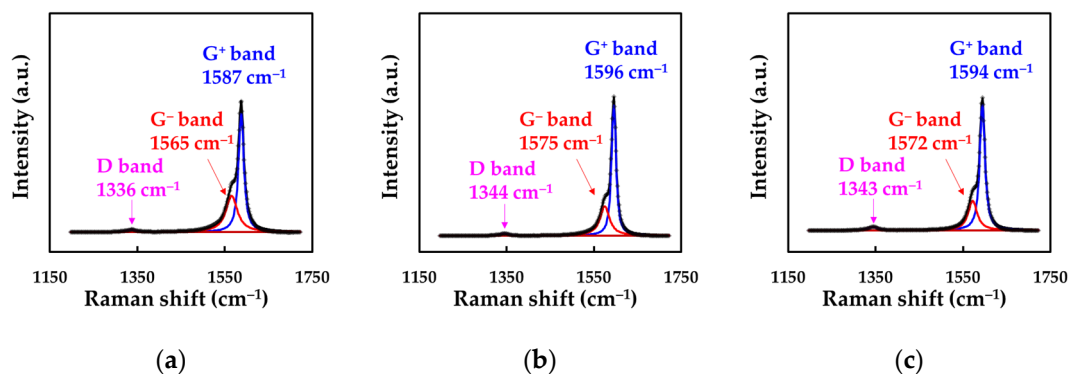

**Figure S3.** The Raman spectra of (a) F<sub>CNT</sub>, (b) F'<sub>CNT</sub>, and (c) F''<sub>CNT</sub>. The dotted line indicates the original Raman spectra.

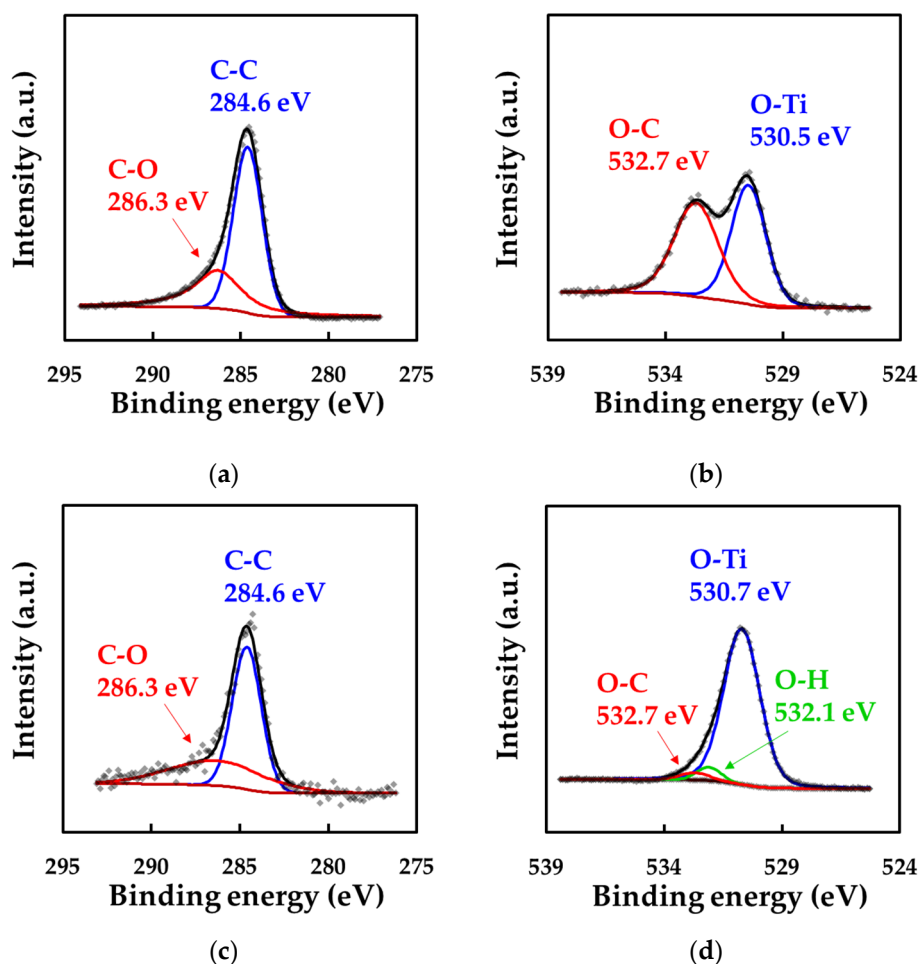

**Figure S4.** C 1s and O 1s XPS spectra of (a,b) F<sub>Titania</sub> and (c,d) F<sub>COMP</sub>, respectively, after Ar<sup>+</sup> ion beam bombardment at a voltage of 150 V for 15 s. The dotted line represents the original XPS data. The solid brown line indicates the Shirley baseline. The colored curves indicate the theoretically fitted curves by assuming a Voigt distribution.
